# Supplementary material for: Isolated oral clefts and school grades: population-based cohort study from Norway
Source: HighWire-hosted journal article supplement (doi:10.1136/bmjopen-2020-046944), 2021-10-01
Supplement: bmjopen-2020-046944supp001_data_supplement.pdf [file bmjopen-2020-046944supp001_data_supplement.pdf]

## Supplementary material

Table S1. Odds ratios with 95% CI for cleft groups compared with the reference group

| Grades              | Any cleft |           | CLO  |           | CLP  |           | CPO  |           |
|---------------------|-----------|-----------|------|-----------|------|-----------|------|-----------|
|                     | OR*       | 95% CI†   | OR*  | 95% CI†   | OR*  | 95% CI†   | OR*  | 95% CI†   |
| Written Norwegian   |           |           |      |           |      |           |      |           |
| 1-2 (low)           | 1.10      | 0.81-1.50 | 0.64 | 0.34-1.22 | 0.92 | 0.53-1.59 | 2.03 | 1.27-3.24 |
| 5-6 (high)          | 0.98      | 0.79-1.21 | 1.26 | 0.90-1.77 | 0.98 | 0.67-1.45 | 0.72 | 0.49-1.07 |
| Oral Norwegian      |           |           |      |           |      |           |      |           |
| 1-2 (low)           | 1.13      | 0.82-1.58 | 0.77 | 0.39-1.51 | 1.25 | 0.73-2.13 | 1.41 | 0.82-2.41 |
| 5-6 (high)          | 0.94      | 0.77-1.14 | 1.29 | 0.94-1.77 | 0.92 | 0.65-1.30 | 0.66 | 0.46-0.95 |
| Written English     |           |           |      |           |      |           |      |           |
| 1-2 (low)           | 1.21      | 0.93-1.57 | 0.97 | 0.61-1.54 | 1.19 | 0.76-1.86 | 1.55 | 0.99-2.43 |
| 5-6 (high)          | 0.95      | 0.76-1.18 | 1.02 | 0.72-1.45 | 0.94 | 0.64-1.38 | 0.87 | 0.58-1.29 |
| Oral English        |           |           |      |           |      |           |      |           |
| 1-2 (low)           | 1.15      | 0.83-1.58 | 1.13 | 0.65-1.95 | 1.33 | 0.78-2.27 | 0.98 | 0.54-1.78 |
| 5-6 (high)          | 0.85      | 0.70-1.05 | 1.10 | 0.79-1.52 | 0.83 | 0.57-1.21 | 0.66 | 0.46-0.95 |
| Mathematics         |           |           |      |           |      |           |      |           |
| 1-2 (low)           | 1.20      | 0.97-1.48 | 0.98 | 0.67-1.43 | 1.30 | 0.91-1.87 | 1.34 | 0.93-1.93 |
| 5-6 (high)          | 0.89      | 0.70-1.14 | 1.22 | 0.84-1.77 | 0.67 | 0.42-1.06 | 0.78 | 0.50-1.23 |
| Physical Education  |           |           |      |           |      |           |      |           |
| 1-2 (low)           | 0.64      | 0.38-1.06 | 0.14 | 0.02-1.01 | 0.64 | 0.27-1.51 | 1.03 | 0.51-2.09 |
| 5-6 (high)          | 0.81      | 0.67-0.97 | 1.03 | 0.76-1.39 | 0.60 | 0.43-0.82 | 0.84 | 0.62-1.15 |
| Grade Point Average |           |           |      |           |      |           |      |           |
| <3 (low)            | 1.30      | 1.01-1.66 | 0.94 | 0.59-1.49 | 1.42 | 0.93-2.18 | 1.61 | 1.06-2.45 |
| ≥5 (high)           | 1.11      | 0.84-1.48 | 1.26 | 0.81-1.97 | 1.20 | 0.71-2.01 | 0.90 | 0.53-1.53 |

\* ORs are adjusted for sex, maternal age, mother's relationship status, parent's highest level of education, and parity. Medium grades (3-4) is the reference category for both low grades (1-2) and high grades (5-6). For the grade point average, (≥3 and <5) is the reference.

† Adjusted for correlation between siblings using robust variance estimates

**Table S2. Odds ratios with 95% CI for cleft cases compared with siblings**

| Grades              | Any cleft |           | CLO  |           | CLP  |           | CPO  |           |
|---------------------|-----------|-----------|------|-----------|------|-----------|------|-----------|
|                     | OR*       | 95% CI    | OR*  | 95% CI    | OR*  | 95% CI    | OR*  | 95% CI    |
| Written Norwegian   |           |           |      |           |      |           |      |           |
| 1-2 (low)           | 1.31      | 0.54-3.16 | 1.21 | 0.22-6.55 | 1.83 | 0.23-14.3 | 1.22 | 0.37-4.03 |
| 5-6 (high)          | 1.01      | 0.56-1.81 | 1.29 | 0.53-3.11 | 0.80 | 0.26-2.43 | 0.85 | 0.27-2.68 |
| Oral Norwegian      |           |           |      |           |      |           |      |           |
| 1-2 (low)           | 1.78      | 0.74-4.32 | 1.09 | 0.28-4.16 | 2.32 | 0.14-37.8 | 2.56 | 0.70-9.34 |
| 5-6 (high)          | 0.84      | 0.51-1.38 | 1.43 | 0.70-2.91 | 0.13 | 0.03-0.64 | 0.96 | 0.40-2.33 |
| Written English     |           |           |      |           |      |           |      |           |
| 1-2 (low)           | 0.85      | 0.44-1.66 | 0.52 | 0.19-1.43 | 1.42 | 0.31-6.48 | 1.15 | 0.38-3.46 |
| 5-6 (high)          | 0.91      | 0.54-1.54 | 1.09 | 0.49-2.42 | 0.55 | 0.20-1.50 | 1.22 | 0.42-3.53 |
| Oral English        |           |           |      |           |      |           |      |           |
| 1-2 (low)           | 0.68      | 0.27-1.73 | 1.13 | 0.24-5.27 | 0.19 | 0.02-1.92 | 0.78 | 0.19-3.30 |
| 5-6 (high)          | 0.72      | 0.43-1.21 | 0.89 | 0.40-1.96 | 0.49 | 0.20-1.24 | 0.87 | 0.30-2.58 |
| Mathematics         |           |           |      |           |      |           |      |           |
| 1-2 (low)           | 0.80      | 0.45-1.42 | 0.79 | 0.30-2.11 | 1.14 | 0.38-3.42 | 0.63 | 0.24-1.61 |
| 5-6 (high)          | 0.81      | 0.45-1.48 | 1.23 | 0.51-2.98 | 0.65 | 0.20-2.09 | 0.49 | 0.14-1.65 |
| Physical Education  |           |           |      |           |      |           |      |           |
| 1-2 (low)           | 0.93      | 0.28-3.11 | n.a. |           | 1.93 | 0.17-21.3 | 1.29 | 0.25-6.56 |
| 5-6 (high)          | 0.99      | 0.62-1.58 | 1.35 | 0.60-3.02 | 0.61 | 0.28-1.34 | 1.23 | 0.52-2.88 |
| Grade Point Average |           |           |      |           |      |           |      |           |
| <3 (low)            | 0.99      | 0.50-1.95 | 0.81 | 0.26-2.47 | 1.95 | 0.36-10.6 | 0.88 | 0.31-2.49 |
| ≥5 (high)           | 0.87      | 0.45-1.69 | 1.37 | 0.48-3.91 | 0.72 | 0.19-2.71 | 0.57 | 0.17-1.87 |

\* Conditional logistic regression estimates with adjustment for sex, maternal age, and parity. Medium grades (3-4) is the reference category for both low grades (1-2) and high grades (5-6). For the grade point average, (≥3 and <5) is the reference.

### Supplementary figure legends

#### Supplementary figure S1.

Sex-specific difference in means for the grade point average comparing each cleft group with the reference group. Horizontal bars represent 95% confidence intervals. Linear regression analyses were adjusted for maternal age, parity, mother's relationship status, and parent's highest level of education at the time when study participants were 16 years old.

#### Supplementary figure S2.

Difference in means for the grade point average between right- and left-sided unilateral cleft lip. Horizontal bars represent 95% confidence intervals. Linear regression analyses were adjusted for sex, maternal age, parity, mother's relationship status, and parent's highest level of education at the time when study participants were 16 years old.

#### Supplementary figure S3.

Difference in means for the grade point average comparing each cleft group with the reference group for isolated clefts and when including all cleft cases. Horizontal bars represent 95% confidence intervals. Linear regression analyses were adjusted for sex, maternal age, parity, mother's relationship status, and parent's highest level of education at the time when study participants were 16 years old.

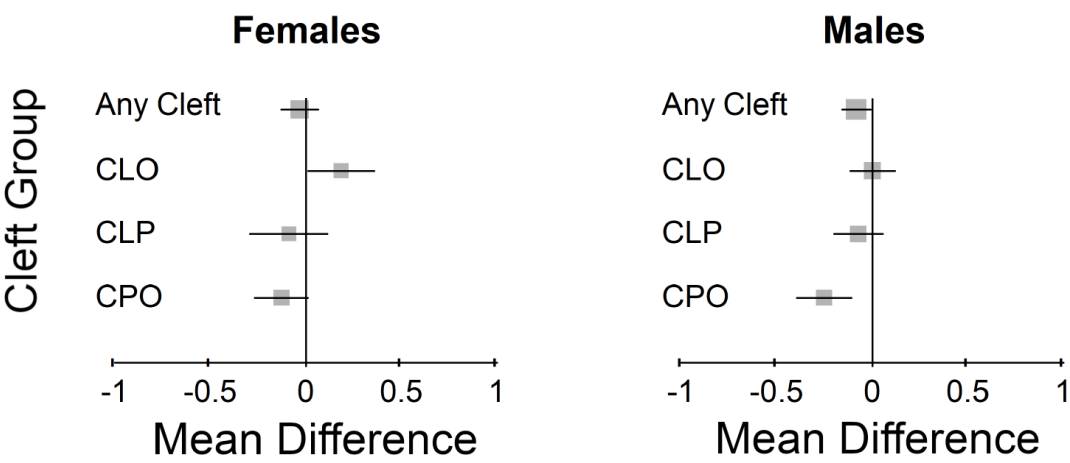

Figure S1

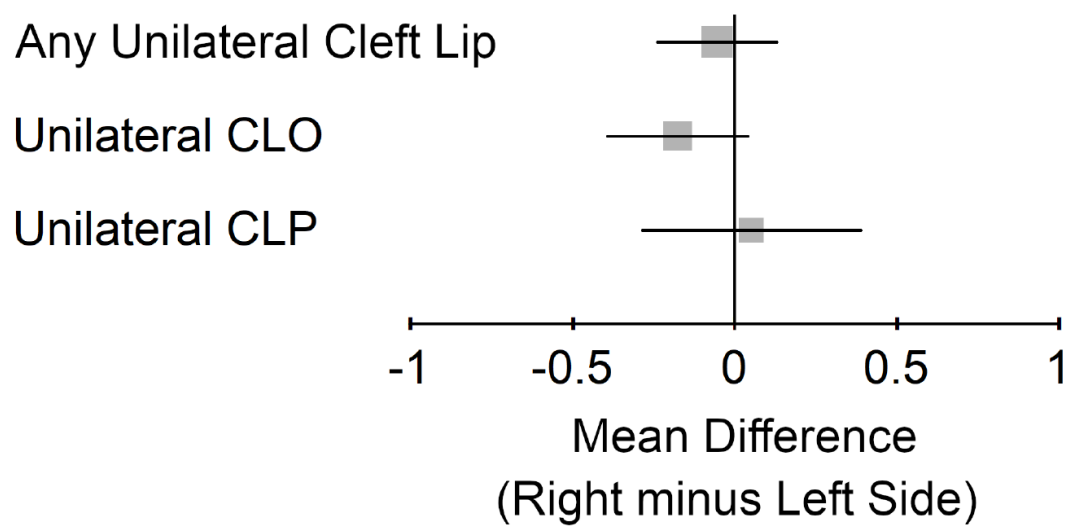

Figure S2

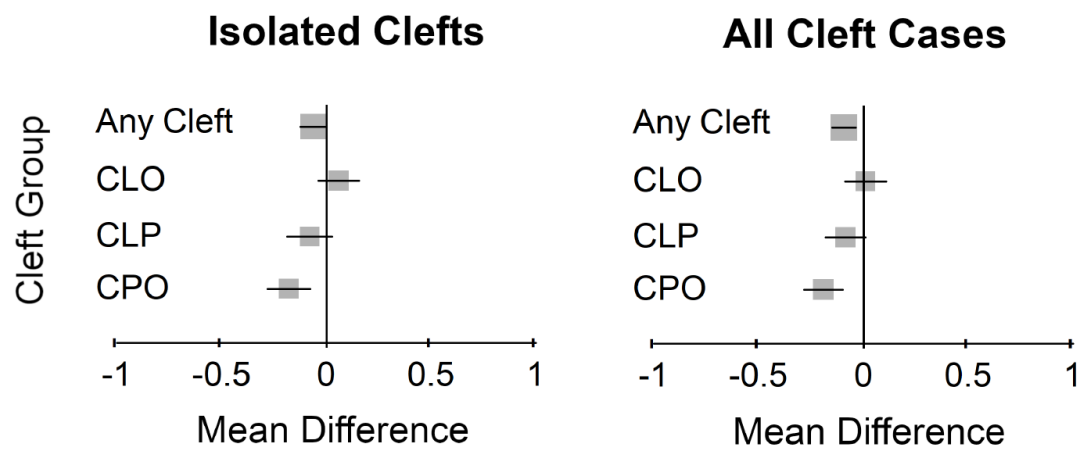

Figure S3
